# Supplementary material
Source: publisher figshare collection journal article supplement (https://acs.figshare.com/ndownloader/files/4604230)
Supplement: Supplementary file 1 [file 4604230]

Supporting Information

Probing Fibronectin-Surface Interactions: A Multitechnique Approach.

Elodie Velzenberger,*,+ Isabelle Pezron,‡ Gilbert Legeay,§ Marie-Danielle Nagel,+ Karim El Kirat+

Université de Technologie de Compiègne (UTC), BP 20529, 60205 Compiègne cedex, France

Centre de Transfert de Technologie du Mans, 20 rue Thalès de Milet, 72000 Le Mans, France

* Corresponding author. Phone: +33 (0)3 44 23 44 21. Fax: +33 (0)3 44 23 79 42. E-mail: elodie.velzenberger@utc.fr

+ Université de Technologie de Compiègne, CNRS UMR 6600, Biomécanique et Bioingénierie

‡ Université de Technologie de Compiègne, EA Transformations Intégrées de la Matière Renouvelable

§ Centre de Transfert de Technologie du Mans

**Pre-osteoblasts culture**

Pre-osteoblasts MC-3T3 E1 subclone 24 (ATCC® number CRL-2595™, LGC Promochem Sarl, Molsheim, France) were cultured in Minimum Essential Medium alpha (-MEM, Gibco Invitrogen, Cergy-Pontoise, France) supplemented with 10% foetal bovine serum (FBS, Gibco Invitrogen, Cergy-Pontoise, France), 1% L-glutamine (Gibco Invitrogen, Cergy-Pontoise, France), penicillin (100U/mL) and streptomycin (100µg/mL). Cells were removed from culture flasks (Falcon, Dominique Dutscher, Issy-les-Moulineaux, France) by trypsinization for 4min at 37°C before cell seeding.

**Preparation of fluo-Fn**

Fluorescein isothiocyanate (FITC, Sigma Aldrich, St. Quentin Fallavier, France) was dissolved at 10mg/mL in DMSO. 10µL of solubilized FITC were mixed with 1mL of Fn (1mg/mL, Roche Diagnostics, Meylan, France) in 0.1M sodium bicarbonate buffer pH9 at 37°C for 1h. The labeled Fn was separated from unconjugated dye on a Sephadex™ G-25 column (PD-10, GE Healthcare Europe GmbH, Orsay, France) equilibrated with PBS pH7.5. For each fraction of the column, the protein concentration was estimated by the method of Bradford1 by reading OD at 595nm and the content in fluorescein was followed by reading OD at 494nm (Fig.1). The conjugated protein eluted first and the slower moving band was the unreacted FITC. The fractions containing high concentrations in Fn were stored at 10°C.


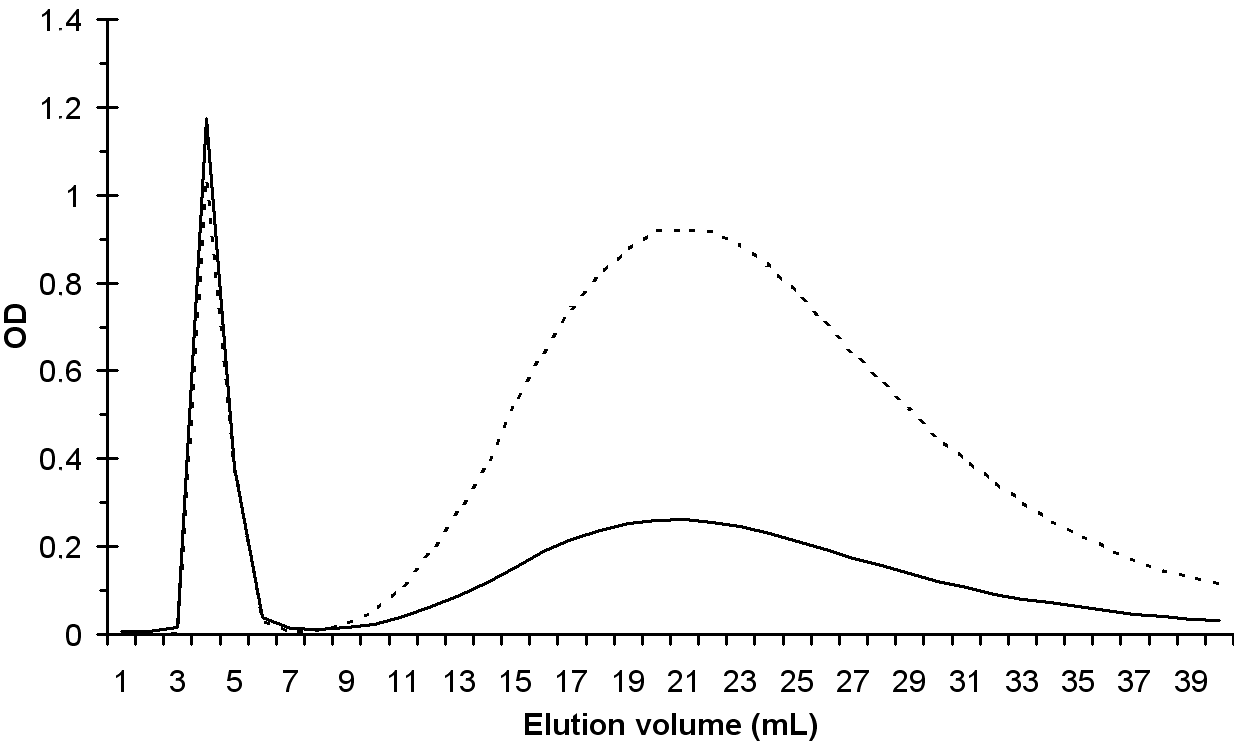


**Figure S1:** Graph representing the elution diagram of fluo-Fn. The full line and the dotted line represent the OD of each fraction at =280nm and =494nm respectively.

For each fraction which contained the fluo-Fn, the fluorescein/protein molar ratio was estimated:

[FITC] / [fluo-Fn] = OD494nm / (FITC × [fluo-Fn])

where FITC was determined with a standard curve representing measured OD at 494nm of FITC solutions at known concentrations, and where [fluo-Fn] was determined with the Bradford technique using a calibration curve of native Fn solutions with predefined concentrations.

The isothiocyanate group reacts with amino terminal and primary amines in proteins. Human plasma Fn contains 156 lysines and 2 amino terminal groups per dimer for a total 158 FITC-grafting possibilities. The calculated ratio [FITC] / [fluo-Fn] was always in the range of 15 to 20 molecules of fluorescein per Fn molecule.

**References**

(1) Bradford, M. M*. Anal Bioch*e**m 19**76*,* 72, 248-54.


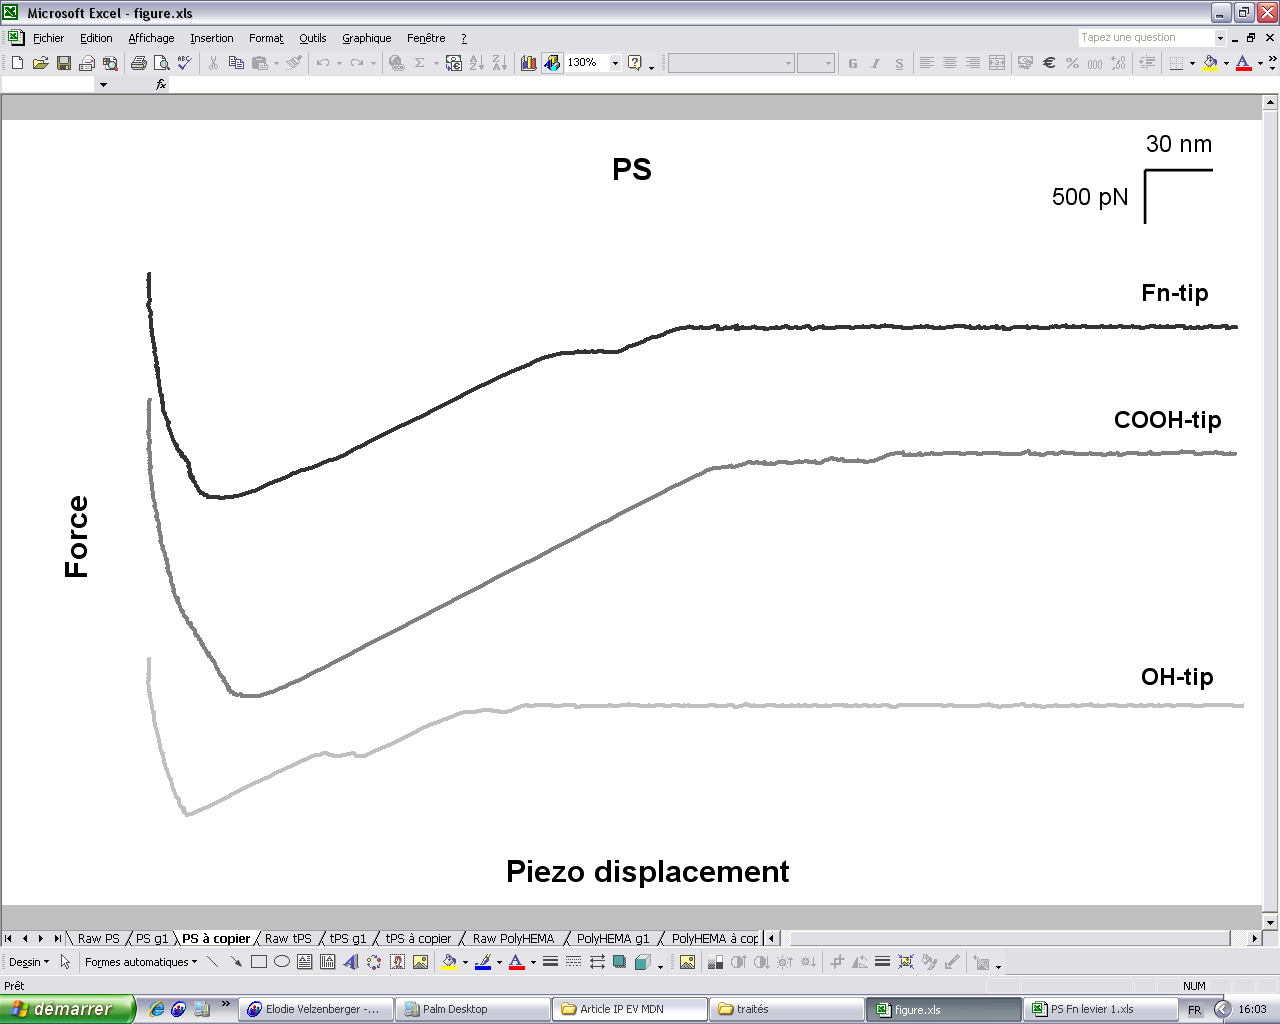

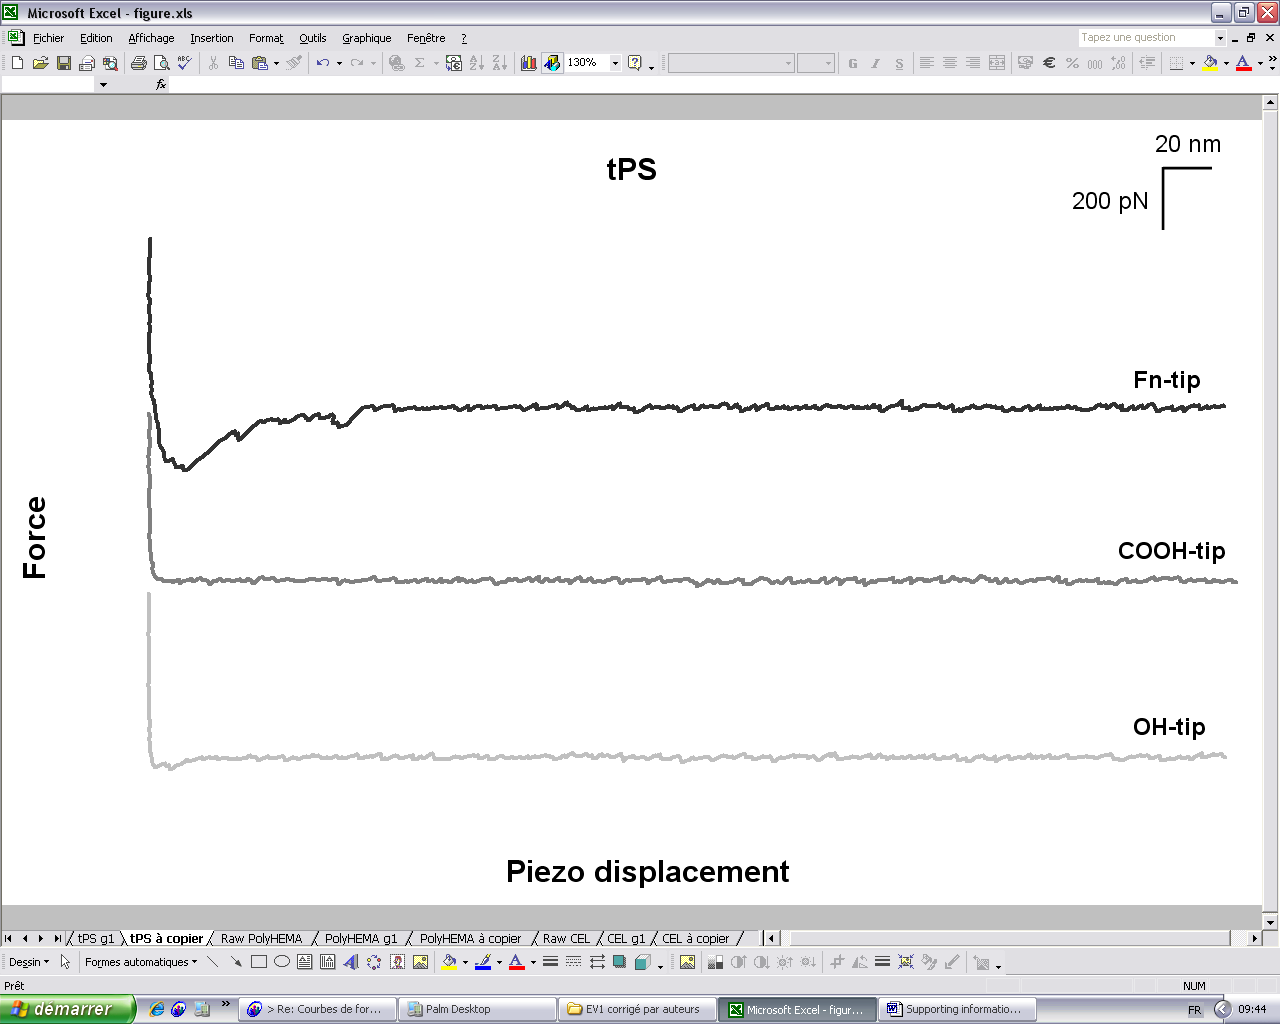


a

b

d

c


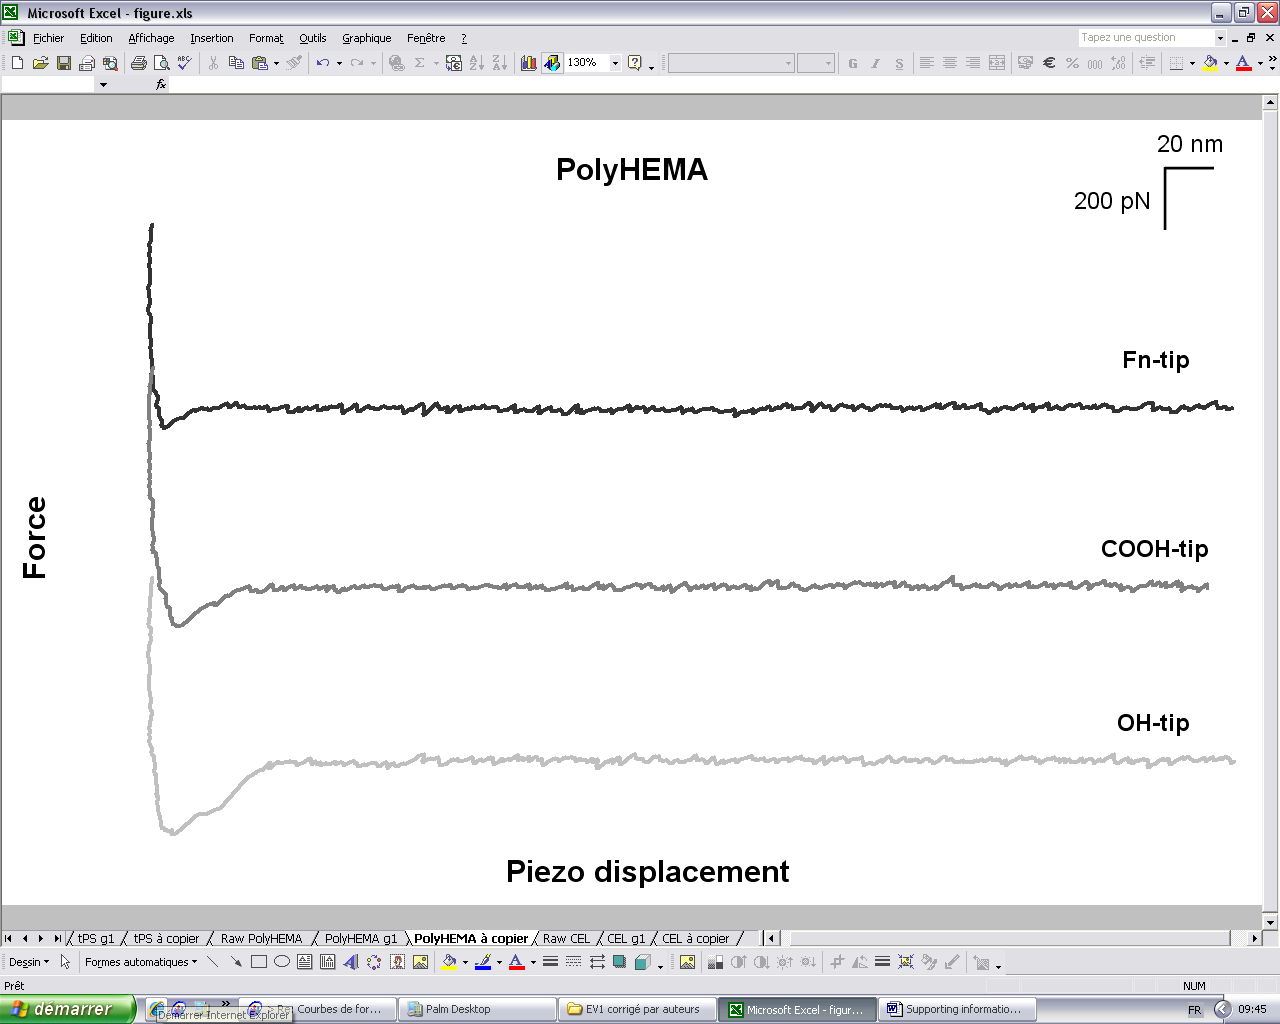

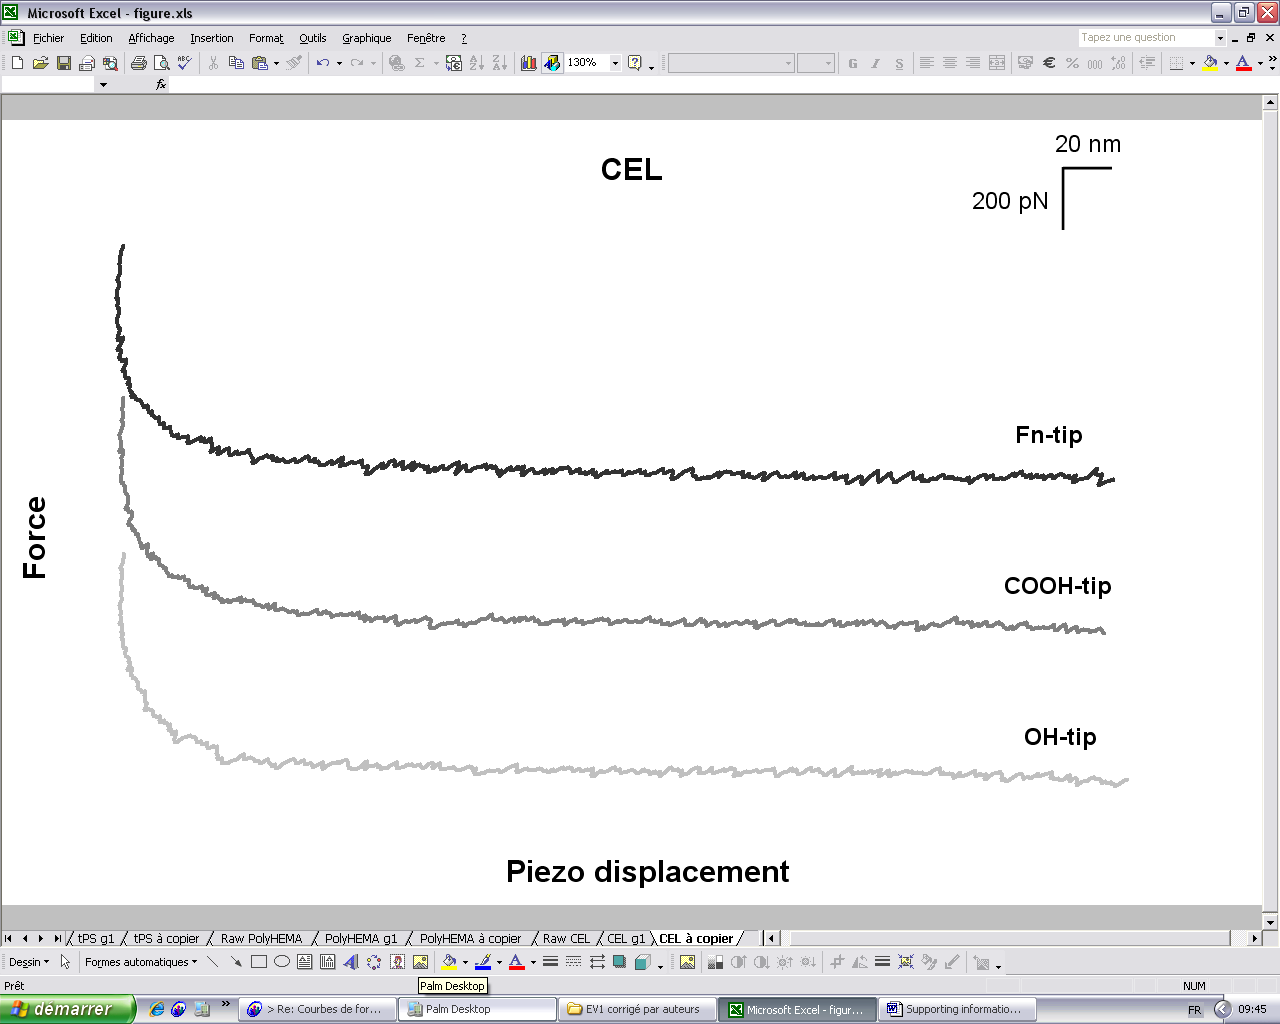


**Figure S2:** Typical force curves recorded on (a) PS, (b) tPS, (c) PolyHEMA and (d) CEL by using AFM tips modified with different functions: a Fn-tip (black line), a COOH-tip (dark grey line) and a OH-tip (light grey line).


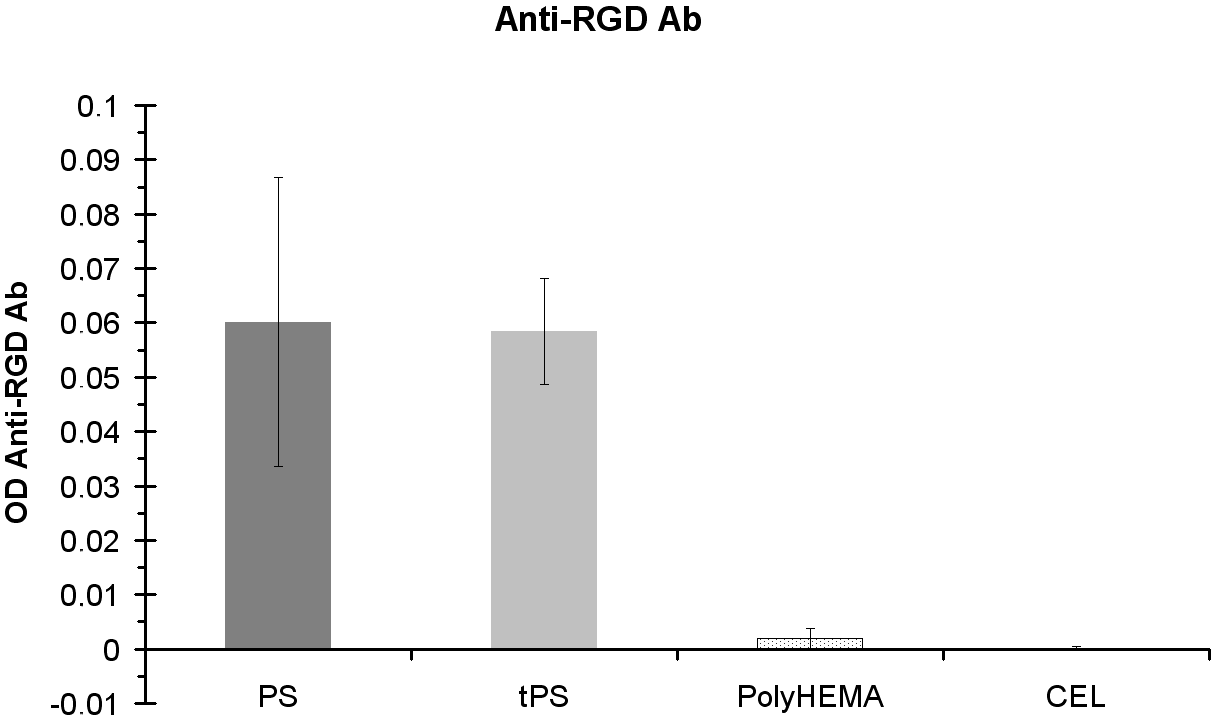

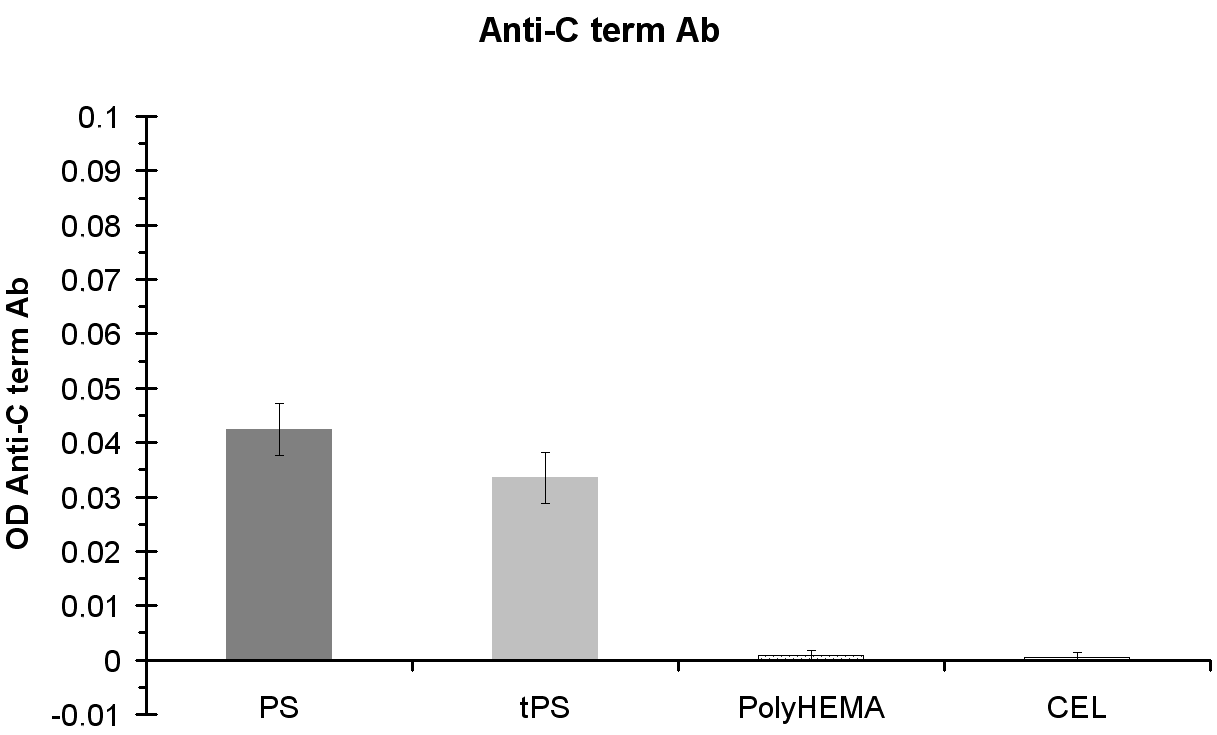


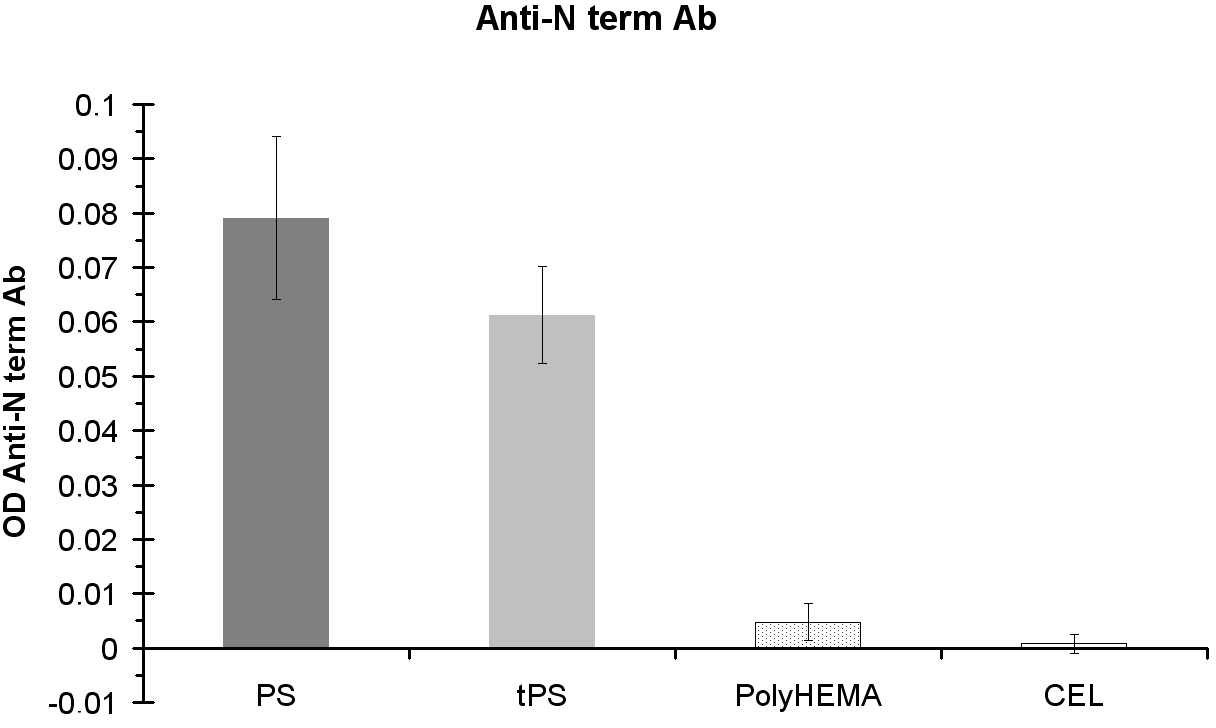

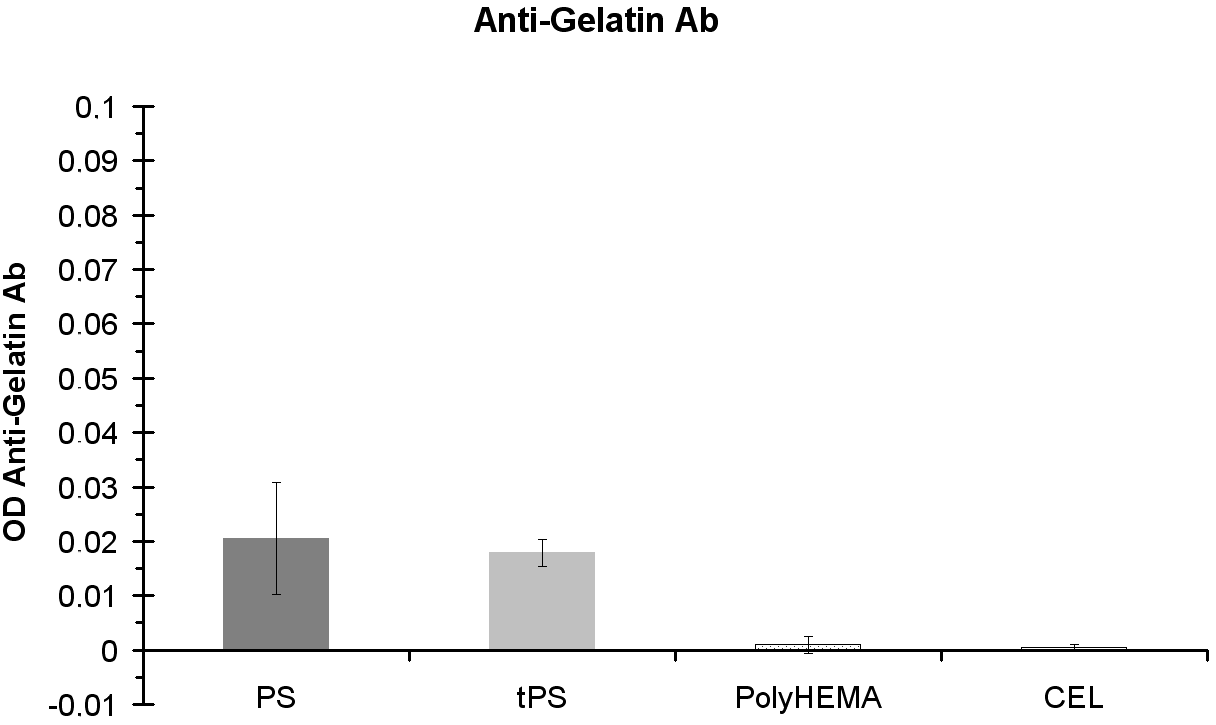


**Figure S3:** ELISA results with the monoclonal antibodies (raw data).
